# Supplementary material
Source: HighWire-hosted journal article supplement (http://www.ajevonline.org/highwire/filestream/1940/field_highwire_adjunct_files/0/Supplemental_Data.pdf)

**Supplemental Data for:**

Howe, P.A., S.E. Ebeler, and G.L. Sacks. 2015.

Review of thirteen years of CTS winery laboratory collaborative data.

Am. J. Enol. Vitic. 66:321-339. doi: 10.5344/ajev.2015.14119.

**Supplementary Material** Mean, standard deviation (SD), and relative standard deviation (RSD) for multiple analytes over the course of the study, demonstrating variability and apparent wine matrix effects. Green: white wines; Pink: blush wines; Red: red wines.

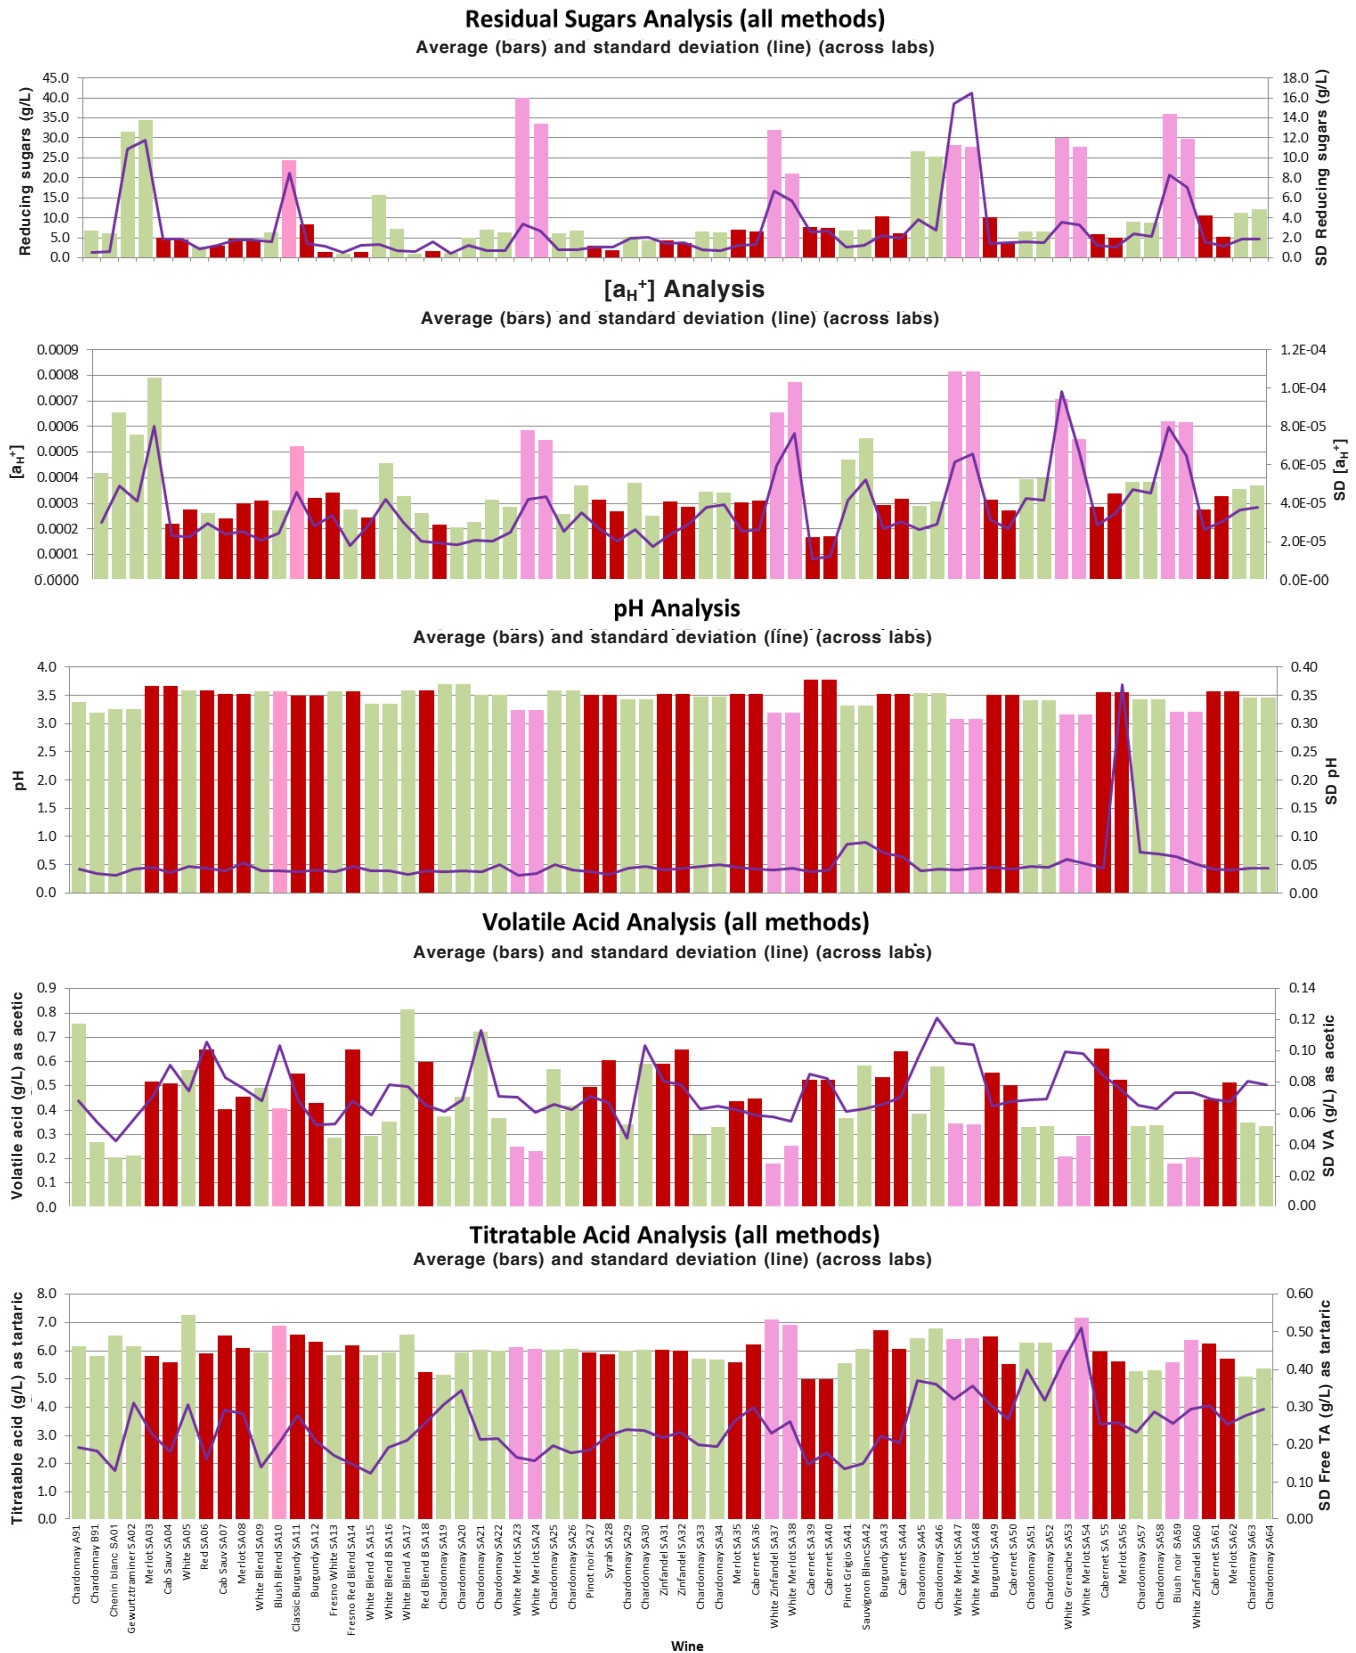

**Supplemental Data for:**

Howe, P.A., S.E. Ebeler, and G.L. Sacks. 2015.  
 Review of thirteen years of CTS winery laboratory collaborative data.  
 Am. J. Enol. Vitic. 66:321-339. doi: 10.5344/ajev.2015.14119.

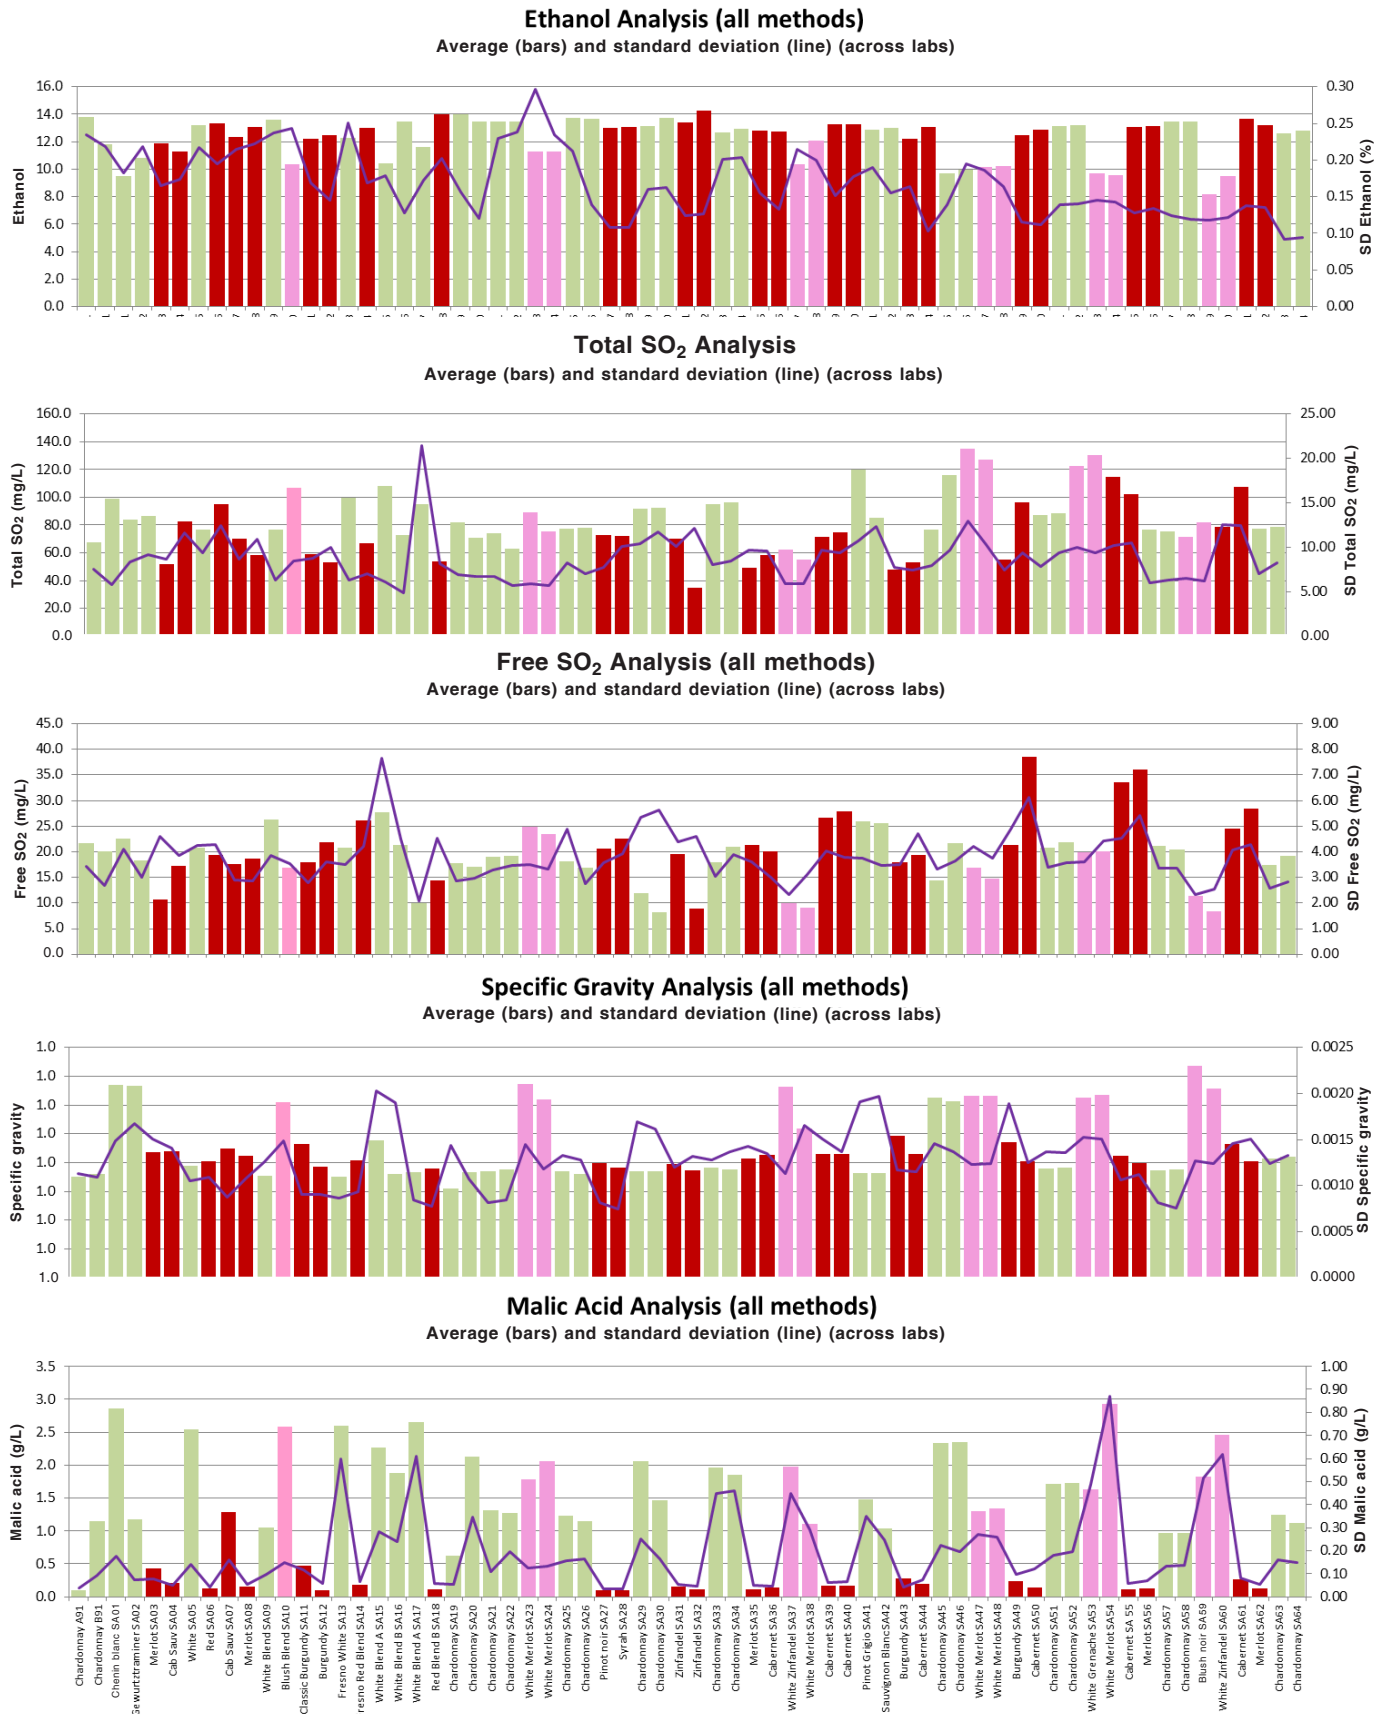

**Supplemental Data for:**

Howe, P.A., S.E. Ebeler, and G.L. Sacks. 2015.

Review of thirteen years of CTS winery laboratory collaborative data.

Am. J. Enol. Vitic. 66:321-339. doi: 10.5344/ajev.2015.14119.

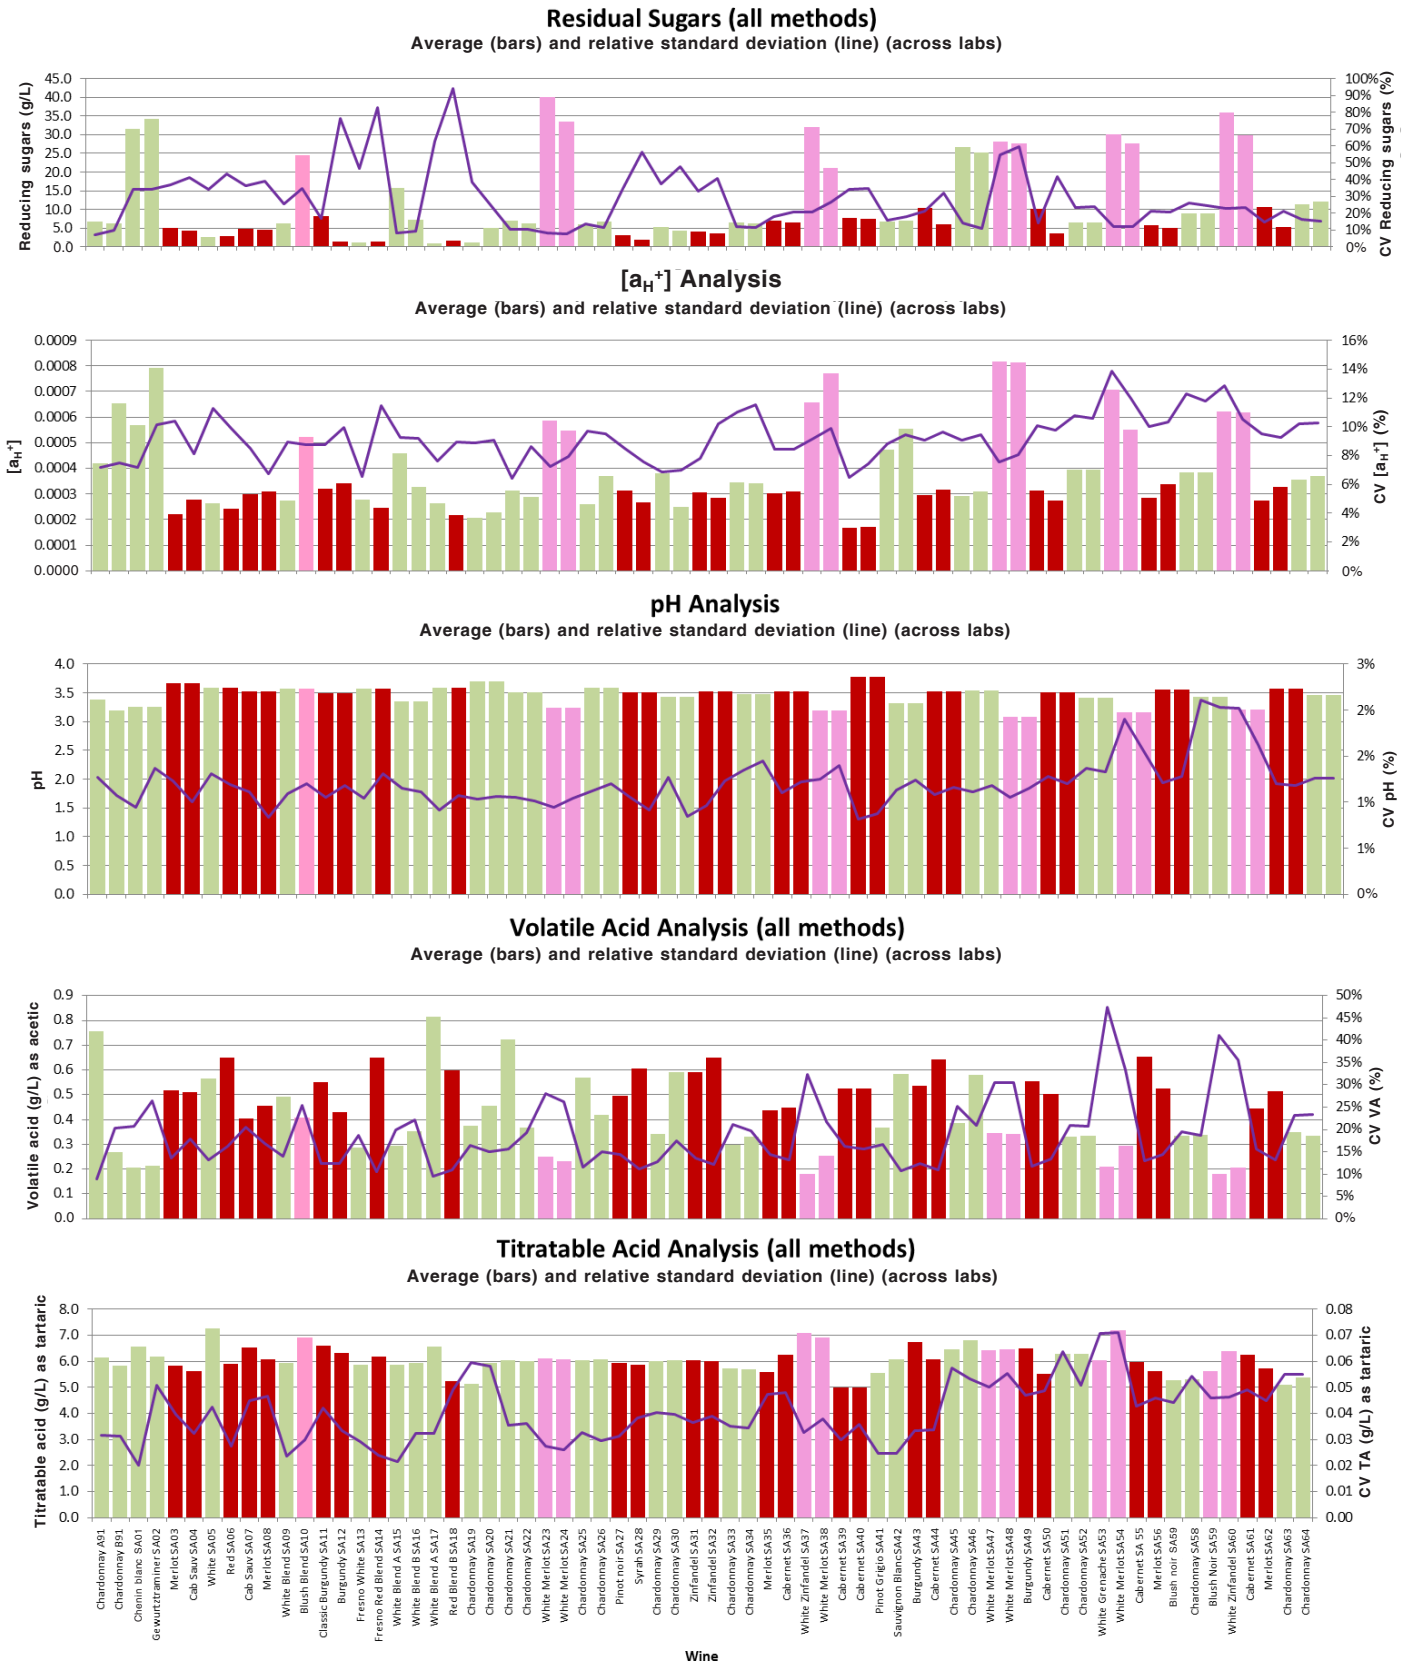

**Supplemental Data for:**

Howe, P.A., S.E. Ebeler, and G.L. Sacks. 2015.  
 Review of thirteen years of CTS winery laboratory collaborative data.  
 Am. J. Enol. Vitic. 66:321-339. doi: 10.5344/ajev.2015.14119.

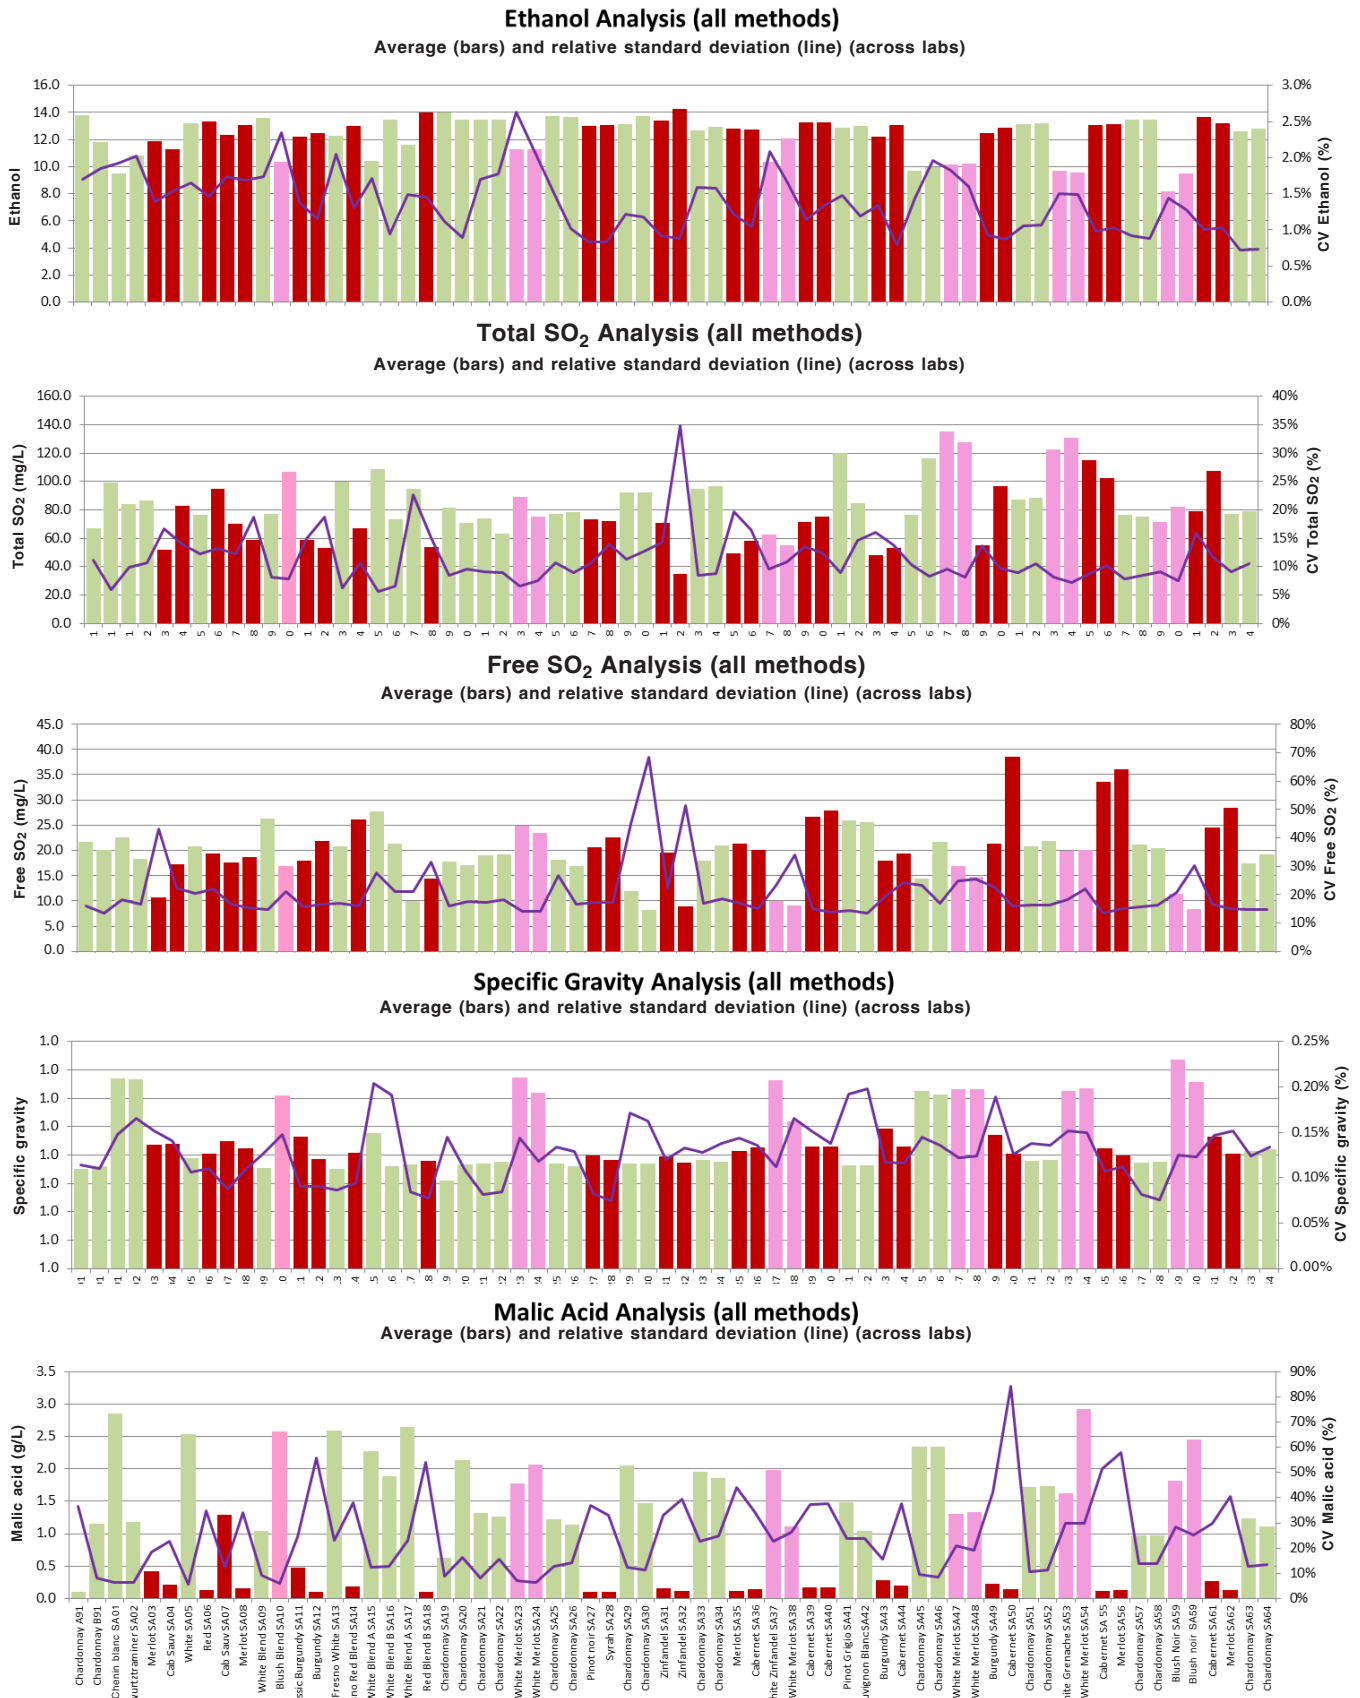

Supplement: Supplemental_Data.pdf [file Supplemental_Data.pdf]
